# Supplementary material for: Coffee Silverskin: Chemical and Biological Risk Assessment and Health Profile for Its Potential Use in Functional Foods
Source: MDPI journal article supplement (doi:10.3390/foods11182834), 2022-09-13
Supplement: s1 [file s1]

Table S1. Multiresidual list of pesticides assessed in silverskin (CS) by GC MS/MS (list 1) and LC MS/MS (list 2)

LIST 1

|                                                        |                                                           |                                                                               |                                                            |
|--------------------------------------------------------|-----------------------------------------------------------|-------------------------------------------------------------------------------|------------------------------------------------------------|
| Acephate                                               | Aclonifen                                                 | Acrinathrin                                                                   | Alachlor                                                   |
| Ametryn                                                | Amitraz                                                   | Atrazine                                                                      | Azinphos ethyl                                             |
| Azinphos methyl                                        | Azoxystrobin                                              | Benalaxyl                                                                     | Benfluralin                                                |
| Benfuracarb                                            | Bifenthrin                                                | Bitertanol                                                                    | Boscalid                                                   |
| Bromopropylate                                         | Bromuconazole (sum of diastereoisomer)                    | Bupirimate                                                                    | Buprofezin                                                 |
| Cadusafos                                              | Captafol                                                  | Captan                                                                        | Carbaryl                                                   |
| Carbofuran                                             | Carbophenothion                                           | Carbosulfan                                                                   | Chlorfenapyr                                               |
| Chlorfevinphos                                         | Chlormefos                                                | Chlorothalonil                                                                | Chlorpropham                                               |
| Chlorpyrifos ethyl                                     | Chlorpyrifos methyl                                       | Chlorthal dimetil                                                             | Chlozolate                                                 |
| Chlordane                                              | Cypermethrin (sum of isomers)                             | Cyproconazole                                                                 | Cyprodinil                                                 |
| Cyflutrin (sum of isomers)                             | Deltamethrin                                              | Diazinon                                                                      | Dichlobenil                                                |
| DDT (sum of p,p' DDT, o,p' DDT, p,p' DDE, and p,p' TDE | Dichloran.                                                | Dichlorvos                                                                    | Diclobutrazol                                              |
| (DDD) expressed as DDT)                                | Dieldrin (sum of Aldrin and Dieldrin expressed as Delrin) | Difenoconazole                                                                | Dimethoate (sum of Dimethoate and Omethoate as Dimethoate) |
| Dichiofluania                                          | Disulfoton                                                | Endosulfan-sulfate (sum of isomer a,b, e sulfate expressed as Endosulfan)     | Diquat                                                     |
| Dicofol                                                | Ethiofencarb                                              | Ethion                                                                        | Endrin                                                     |
| Diphenylamine                                          | Etofenprox                                                | Exithiazox                                                                    | Ethoprophos                                                |
| Esfenvalerate                                          | Fenamiphos                                                | Fenarimol                                                                     | Famoxadone                                                 |
| Ethoxyguine                                            | Fenchlorphos                                              | Fenhexamid                                                                    | Fenazaquin                                                 |
| Fenamidone                                             | Fenpropathrin                                             | Fenpropidin                                                                   | Fenitrothion                                               |
| Fenbuconazole                                          | Fipronil                                                  | Fluazifop P.butile                                                            | Fenthion                                                   |
| Fenoxycarb                                             | Flusilazole                                               | Fluvalinate                                                                   | Flucytrinate                                               |
| Fenvalerate                                            | Furathiocarb                                              | Heptachlor (sum of Heptachlor and Heptachlor epoxide expressed as Heptachlor) | Folpet                                                     |
| Fludioxonl                                             | HCH-a                                                     |                                                                               | Heptenophos                                                |
| Furalaxit                                              |                                                           |                                                                               | Gamma - hexachlorohexane (lindane)                         |
| Hexachlorobenzene                                      |                                                           |                                                                               | Iprodione                                                  |
| Hexaconazole                                           | haloxyfop methyl                                          | HCH                                                                           | Lambda-Cyhalothrin                                         |
| Iprovalicarb                                           | Imazall                                                   | Indoxacarb (sum of Indoxacarb and its enantiomer R)                           | Mepanipyrim                                                |
| Lenacil                                                | Isophenphos                                               | Kresoxim-methyl                                                               | Methiocarb                                                 |
| Metalaxyl (sum of isomers including Metalaxyl-m)       | Linuron                                                   | Malathion                                                                     | Metribuzin                                                 |
| Metholachlor                                           | Methamidophos                                             | Methidathion                                                                  | Oxamyl                                                     |
| Myclobutanil                                           | Methomyl                                                  | Methoxiclor                                                                   | Parathion methyl                                           |
| Oxyfluorfen                                            | Nuarimol                                                  | Oxadixyl                                                                      | Pertane                                                    |
| Penconazole                                            | Paclobutrazolo                                            | Parathion ethyl                                                               | Phosphamidone                                              |
| Phorate                                                | Pendimetalin                                              | Permethrin (sum of isomers)                                                   | Profenophos                                                |
| Pirimicarb                                             | Phosalone                                                 | Phosmet                                                                       | Propham                                                    |
| Propachior                                             | Prochloraz                                                | Procymidone                                                                   | Pyraclostrobin                                             |
| Propiconazole                                          | Propamocarb                                               | Propargite                                                                    | Pyridaphenthion                                            |
| Pyrazofos                                              | Propoxur                                                  | Propyzamide                                                                   | Quinalfos                                                  |
| Pyrifenox                                              | Pyrethrins (technical mixture)                            | Pyridaben                                                                     | Simazine                                                   |
| Quinoxifen                                             | Pirimethanil                                              | Pyriproxyfen                                                                  | Tebuconazole                                               |
| Symetryn                                               | Quintozone                                                | Quizalofop ethyl                                                              | Terbutryn                                                  |
| Tebutenpyrad                                           | Spiromesifen                                              | Sulfotep                                                                      | Tetramethrin                                               |
| Tetrachlorvinphos                                      | Tecnazen                                                  | Tefluthrin                                                                    | Triadimefon e                                              |
|                                                        | Tetraconazole                                             |                                                                               | Triadimenol (sum of Triadimefon and Triadimenol)           |
| Thionazin                                              | Tolclofos methyl                                          | Tetradifon                                                                    | Trifluralin                                                |
| Triazophos                                             | Trichlorfon                                               | Tolyfluanid                                                                   |                                                            |
| Vinclozolin                                            | Zoxamide                                                  | Trifloxystrobin                                                               |                                                            |

LIST 2

|                                                                            |              |                                   |                |
|----------------------------------------------------------------------------|--------------|-----------------------------------|----------------|
| 2,4-D (sum of 2,4-D, its salts, esters, and conjugates expressed as 2,4-D) | Abamectin    | Acephate                          | Acetamiprid    |
| Aldicarb (sum of Aldicarb,                                                 | Ametoctradin | Atrazine                          | Azadirachtin   |
|                                                                            | Benthiocarb  | Bifenazato (sum of bifenazato and | Boscalid       |
|                                                                            | Bromadiolone |                                   | Butoxycarboxim |

|                                                                                                               |                                                                       |                                                                       |                                                                                    |
|---------------------------------------------------------------------------------------------------------------|-----------------------------------------------------------------------|-----------------------------------------------------------------------|------------------------------------------------------------------------------------|
| Aldicarb- sulfone, and Aldicarb- sulfoxide expressed as Aldicarb)                                             | Carbaryl                                                              | bifenazato- diazene expressed as bifenazato)                          | Carbofuran (sum of Carbofuran and 3-Hydroxycarbofuran expressed as Carbofuran)     |
| Azoxystrobin                                                                                                  | Chlorbromuron                                                         | Bromuconazole (sum of Diastereoisomeri)                               | Chlorsulfuron                                                                      |
| Brodifacoum                                                                                                   | Cyromazine                                                            | Carbendazim (sum of Benomil and Carbendazim expressed as Carbendazim) | Cyanophenfos                                                                       |
| Buturon                                                                                                       | Difenoxuron                                                           | Chlorotoluron                                                         | Cyflufenamid                                                                       |
| Chlorantraniliprole                                                                                           | Diniconazole                                                          | Clofentezine                                                          | Dichlofluanid                                                                      |
| Chlothianidin                                                                                                 | Dodine                                                                | Cycloxydim                                                            | Diflufenican                                                                       |
| Cyantraniliprole                                                                                              | Etiofencarb                                                           | Demeton S-methyl sulphone                                             | Ditalimfos                                                                         |
| Cymoxanil                                                                                                     | Fenazaquin                                                            | Diflubenzuron                                                         | Emamectina benzoato (Emamectina B1A expressed as Emamectina)                       |
| Diethofencarb                                                                                                 | Fenoxycarb                                                            |                                                                       | Etoxazole                                                                          |
| Dimethomorph                                                                                                  | Fenuron                                                               |                                                                       | Fenbutatin oxide                                                                   |
|                                                                                                               |                                                                       |                                                                       | Fenpyrazamine                                                                      |
| Diuron                                                                                                        | Fluometuron                                                           | Dioxacarb                                                             | Flonicamid (sum of Flonicamid, TFNA, and TFNG                                      |
| Epoxiconazole                                                                                                 | Flutriafol                                                            | Ema B1B                                                               | exoressed as Flonicamid)                                                           |
| Famoxadone                                                                                                    | Furathiocarb                                                          | Ethofenprox                                                           | Fluopyram Formetanate                                                              |
| Fenhexamid                                                                                                    | Imazamox                                                              | Fenbuconazole                                                         | Hexythiazox                                                                        |
| Fenpyroximate                                                                                                 | Isocarbophos                                                          | Fenpropimorph                                                         | Indoxacarb (sum of indoxacarb and its enantiomer R)                                |
| Flufenoxuron                                                                                                  | Linuron                                                               | Fipronil (sum of Fipronil and Sulfone metabolite                      | Isoproturon                                                                        |
|                                                                                                               |                                                                       |                                                                       | Mandipropamid                                                                      |
| Flupyradifurone                                                                                               | Mepronil                                                              |                                                                       | Metalaxyl (sum of isomers including Metalaxyl-m)                                   |
|                                                                                                               |                                                                       |                                                                       | Methamidophos                                                                      |
| Fosthiazate                                                                                                   | Metamitron                                                            | expressed as Fipronil)                                                | Methoxyfenozide                                                                    |
| Imazalil                                                                                                      | Metholachlor, S-                                                      | Fluopicolide                                                          | Milbemectina A3                                                                    |
| Iprovalicarb                                                                                                  | Metoxuron                                                             | Fluxapyroxad                                                          | Neburon                                                                            |
| Isoapyrazam                                                                                                   | Monolinuron                                                           | Hexaflumuron                                                          | Oxamyl                                                                             |
| Mepanipyrin                                                                                                   | Oxadiazon                                                             | Imidacloprid                                                          | Phenmedipham                                                                       |
| Metalaxyl-m Methiocarb (sum of Methiocarb, Methiocarb- sulfone, Methiocarb-sulfoxide expressed as Methiocarb) | Oxydemethon methyl                                                    | Isufenphos-methyl                                                     | Promecarb                                                                          |
| Metobromuron                                                                                                  | Pirimiphos-ethyl                                                      | Lufenuron Metaflumizone                                               | Propoxur                                                                           |
| Milbemectina A4                                                                                               | Propamocarb (sum of Propamocarb e its salts expressed as Propamocarb) | Metazachlor                                                           | Pyraflufen-ethyl                                                                   |
| Nitenpyran                                                                                                    | Pymetrozine                                                           | Methomyl (sum of Methomyl and Thiodicarb expressed as Methomyl)       | Milbemectina (sum of Milbemectina A4 and Milbemectina A3 expressed as Milbemectina |
| Oxamyl-oxime                                                                                                  | Rotenone                                                              | Metrafenone                                                           | Spiromesifen                                                                       |
| Pirimicarb                                                                                                    | Spinosad (sum of Spinosyn-a, Spinosyn-d expressed as Spinosad)        | Monuron                                                               | Tebufenozide                                                                       |
| Prometrin                                                                                                     | Spiroxamine                                                           | Oxadixyl                                                              | Thiacloprid                                                                        |
| Prosulfocarb                                                                                                  | Teflubenzuron                                                         | Penthiopyrad                                                          | Thiophanate methyl                                                                 |
| Pyriproxyfen                                                                                                  | Thiobencarb                                                           | Pirimiphos-methyl                                                     | Triforine                                                                          |
| Spinetoram                                                                                                    | Tridemorph                                                            | Propargite                                                            |                                                                                    |
| (Spirotetramat and its 4 metabolites expressed as Spirotetramat)                                              | (Aquatecide) 2-4 Na diclorophenoxyacetate                             | Pyraclostrobin                                                        |                                                                                    |
|                                                                                                               |                                                                       | Simazine                                                              |                                                                                    |
| Tebufenpyrad                                                                                                  | Tiguron                                                               | Spirodiclofen                                                         |                                                                                    |
| Thiametoxam                                                                                                   |                                                                       | Sulfoxaflor (sum of isomers)                                          |                                                                                    |
| Tolclofos methyl                                                                                              |                                                                       | Thiabendazole                                                         |                                                                                    |
| Zoxamide                                                                                                      |                                                                       | Thiocyclam                                                            |                                                                                    |
|                                                                                                               |                                                                       | Triflumuron                                                           |                                                                                    |

Table S2. Hazard quotient (HQ) based on consumption of 5g and 10g of three class samples of coffee silverskin (CS) and the threshold values for each contaminant expressed as tolerable daily intake (TDI, mg/kg<sub>bw</sub>/day). If not available, TDI was derived from tolerable week intake<sup>a</sup> (TWI, mg/kg<sub>bw</sub>/week), provisional tolerable week intake<sup>b</sup> (PTWI, mg/kg<sub>bw</sub>/week), or reference dose<sup>c</sup> (RfD, mg/kg<sub>bw</sub>/day).

| Contaminant         | HQ (IR: 5g)    |              |                | HQ (IR: 10g)   |              |                | TDI<br>(mg/kg <sub>bw</sub> /day) | Reference |
|---------------------|----------------|--------------|----------------|----------------|--------------|----------------|-----------------------------------|-----------|
|                     | <i>Robusta</i> | <i>Mixed</i> | <i>Arabica</i> | <i>Robusta</i> | <i>Mixed</i> | <i>Arabica</i> |                                   |           |
| <b>As</b>           | 2.08E-05       | 5.12E-02     | 6.50E-02       | 4.15E-05       | 1.02E-01     | 1.30E-01       | 3.00E-04                          | [48]      |
| <b>Ba</b>           | 2.02E-03       | 1.77E-02     | 2.17E-02       | 4.03E-03       | 3.53E-02     | 4.33E-02       | 2.00E-01                          | [49]      |
| <b>Be</b>           | 4.29E-06       | 1.79E-03     | 2.14E-03       | 8.57E-06       | 3.57E-03     | 4.29E-03       | 2.00E-03                          | [50]      |
| <b>B</b>            | 2.24E-03       | 1.36E-02     | 1.39E-02       | 4.47E-03       | 2.72E-02     | 2.78E-02       | 1.70E-01                          | [51]      |
| <b>Cd</b>           | NA             | NA           | 3.00E-02       | NA             | NA           | 6.00E-02       | 2.50E-03 <sup>b</sup>             | [52]      |
| <b>Co</b>           | 3.21E-05       | 1.61E-03     | 8.57E-04       | 6.41E-05       | 3.22E-03     | 1.71E-03       | 3.00E-02 <sup>c</sup>             | [53]      |
| <b>Cr</b>           | 4.25E-05       | 1.15E-04     | 6.12E-05       | 8.50E-05       | 2.29E-04     | 1.22E-04       | 3.00E-01                          | [54]      |
| <b>Fe</b>           | 4.51E-02       | 3.25E-02     | 1.82E-02       | 9.02E-02       | 6.50E-02     | 3.65E-02       | 7.00E-01                          | [48]      |
| <b>Mn</b>           | 1.48E-03       | 1.26E-02     | 2.71E-02       | 2.97E-03       | 2.51E-02     | 5.42E-02       | 1.40E-01                          | [48]      |
| <b>Hg</b>           | 4.33E-06       | 2.34E-02     | 2.59E-02       | 8.65E-06       | 4.67E-02     | 5.19E-02       | 1.30E-03 <sup>a</sup>             | [55]      |
| <b>Ni</b>           | 7.74E-05       | 1.32E-02     | 5.02E-03       | 1.55E-04       | 2.65E-02     | 1.00E-02       | 1.30E-02                          | [56]      |
| <b>Pb</b>           | 2.57E-05       | NA           | NA             | 5.14E-05       | NA           | NA             | 2.52E-02 <sup>b</sup>             | [57]      |
| <b>Cu</b>           | 9.43E-03       | 5.04E-02     | 1.69E-02       | 1.89E-02       | 1.01E-01     | 3.38E-02       | 1.50E-01                          | [58]      |
| <b>V</b>            | 4.13E-05       | 5.45E-02     | NA             | 8.26E-05       | 1.09E-01     | NA             | 1.00E-03                          | [48]      |
| <b>Zn</b>           | 1.28E-03       | 3.75E-03     | 2.66E-03       | 2.56E-03       | 7.50E-03     | 5.33E-03       | 3.00E-01                          | [48]      |
| <b>Chrysene</b>     | NA             | NA           | 2.98E-03       | NA             | NA           | 5.95E-03       | 1.44E-03 <sup>c</sup>             | [59]      |
| <b>Fluoranthene</b> | NA             | NA           | 3.21E-04       | NA             | NA           | 6.43E-04       | 4.00E-02 <sup>c</sup>             | [48]      |
| <b>Phenanthrene</b> | NA             | NA           | 7.62E-04       | NA             | NA           | 1.52E-03       | 6.56E-03 <sup>c</sup>             | [59]      |
